# Supplementary material for: A plier-shaped binary molecular wheel B7Mg4+cluster: hybrid in-plane heptacoordination, double π/σ aromaticity, and electronic transmutation
Source: Royal Society of Chemistry journal article supplement (doi:10.1039/d2nj05352g), 2022-12-09

## SUPPLEMENTARY INFORMATION

### A plier-shaped binary molecular wheel $B_7Mg_4^+$ cluster: hybrid in-plane heptacoordination, double $\pi/\sigma$ aromaticity, and electronic transmutation

Peng-Fei Han,<sup>a</sup> Ying-Jin Wang,<sup>b</sup> Qiang Sun,<sup>c</sup> and Hua-Jin Zhai<sup>\*a</sup>

<sup>a</sup>*Nanocluster Laboratory, Institute of Molecular Science, Shanxi University, Taiyuan 030006, China*

<sup>b</sup>*Department of Chemistry, Xinzhou Teachers University, Xinzhou 034000, China*

<sup>c</sup>*Center for Applied Physics and Technology, School of Materials Science and Engineering, Peking University, Beijing 100871, China*

\*E-mail: hj.zhai@sxu.edu.cn

**Table S1.** Cartesian coordinates for the top 5 lowest-energy structures of  $B_7Mg_4^+$  cluster at the PBE0/6-311+G\* level.

**Figure S1.** Alternative optimized low-lying structures of  $B_7Mg_4^+$  cluster. Relative energies at the PBE0/6-311+G\* level are shown without brackets, including corrections for the zero-point energies (ZPEs). Also shown are relative energies for top low-lying isomers at the single-point CCSD(T)/6-311+G\* (in brackets) and B3LYP/6-311+G\* (in square brackets) levels. All energies are in eV.

**Figure S2.** Calculated NICS<sub>zz</sub> data for B<sub>7</sub>Mg<sub>4</sub><sup>+</sup> cluster at the PBE0/6-311+G\* level. These values are calculated at the center of a B<sub>3</sub> triangle, as well as of a rhombic unit between a B<sub>3</sub> triangle and the midpoint of two vertical Mg atoms, which are associated to σ aromaticity. Other values are calculated at a distance of 1.0, 1.5, and 2.0 Å above or below the plane, which probe π aromaticity.

**Figure S3.** The iso-chemical shielding surfaces (ICSSs) of B<sub>7</sub>Mg<sup>+</sup> cluster, calculated at the boron plane, as well as at a distance of 0.5, 1.0, and 1.5 Å above the plane, respectively. A positive ICSS value indicates π or σ aromaticity; and vice versa.

**Table S1.** Cartesian coordinates for the top 5 lowest-energy structures of  $B_7Mg_4^+$  cluster at the PBE0/6-311+G\* level.

(a) GM,  $B_7Mg_4^+$  ( $C_s$ ,  $^1A'$ )

|    |             |             |             |
|----|-------------|-------------|-------------|
| B  | -1.44375200 | 1.60305300  | 0.76907200  |
| B  | -0.30314300 | 1.09670100  | 1.71952700  |
| B  | -1.44375200 | 1.60305300  | -0.76907200 |
| B  | -0.30314300 | 1.09670100  | -1.71952700 |
| B  | -0.03066600 | 0.83612600  | 0.00000000  |
| B  | 0.87583200  | 0.12057100  | 1.43694200  |
| B  | 0.87583200  | 0.12057100  | -1.43694200 |
| Mg | -1.44375200 | -0.96698000 | 1.41234400  |
| Mg | 2.50150800  | 0.86356200  | 0.00000000  |
| Mg | -1.44375200 | -0.96698000 | -1.41234400 |
| Mg | 1.12466000  | -1.62825800 | 0.00000000  |

(b) LM,  $B_7Mg_4^+$  ( $D_2$ ,  $^1A$ )

|    |             |             |             |
|----|-------------|-------------|-------------|
| B  | 0.04142600  | 1.40399000  | 0.80764300  |
| B  | -0.04142600 | 1.40399000  | -0.80764300 |
| B  | 0.00000000  | 0.00000000  | -1.62073900 |
| B  | 0.04142600  | -1.40399000 | -0.80764300 |
| B  | -0.04142600 | -1.40399000 | 0.80764300  |
| B  | 0.00000000  | 0.00000000  | 1.62073900  |
| B  | 0.00000000  | 0.00000000  | 0.00000000  |
| Mg | 2.37745600  | -0.93313500 | 1.01522900  |
| Mg | 2.37745600  | 0.93313500  | -1.01522900 |

|    |             |             |             |
|----|-------------|-------------|-------------|
| Mg | -2.37745600 | 0.93313500  | 1.01522900  |
| Mg | -2.37745600 | -0.93313500 | -1.01522900 |

(c) Structure 3, B<sub>7</sub>Mg<sub>4</sub><sup>+</sup> (C<sub>s</sub>, <sup>1</sup>A')

|    |             |             |             |
|----|-------------|-------------|-------------|
| B  | -0.92077800 | 0.14198300  | 0.00000000  |
| B  | -0.51193400 | 1.17170600  | -1.46980800 |
| B  | -0.51193400 | 1.17170600  | 1.46980800  |
| B  | -1.63918800 | -1.34563600 | 0.76843200  |
| B  | -1.63918800 | -1.34563600 | -0.76843200 |
| B  | -1.09322000 | -0.23975000 | 1.73253300  |
| B  | -1.09322000 | -0.23975000 | -1.73253300 |
| Mg | -0.14950500 | 2.74878100  | 0.00000000  |
| Mg | 1.40400200  | -0.01798700 | -1.49136400 |
| Mg | 0.42877700  | -2.42723400 | 0.00000000  |
| Mg | 1.40400200  | -0.01798700 | 1.49136400  |

(d) Structure 4, B<sub>7</sub>Mg<sub>4</sub><sup>+</sup> (C<sub>s</sub>, <sup>1</sup>A')

|    |             |             |             |
|----|-------------|-------------|-------------|
| B  | -0.09103100 | -1.44154900 | 0.79867300  |
| B  | 1.34033600  | -1.11430000 | 1.57929700  |
| B  | 1.34033600  | -1.11430000 | -1.57929700 |
| B  | 0.03724300  | -0.58980800 | -2.21680700 |
| B  | 1.50464300  | -1.36716200 | 0.00000000  |
| B  | -0.09103100 | -1.44154900 | -0.79867300 |
| B  | 0.03724300  | -0.58980800 | 2.21680700  |
| Mg | -1.95640200 | 0.24832600  | 1.41245500  |
| Mg | 1.10687300  | 1.34719000  | -1.41119100 |

|    |             |            |             |
|----|-------------|------------|-------------|
| Mg | -1.95640200 | 0.24832600 | -1.41245500 |
| Mg | 1.10687300  | 1.34719000 | 1.41119100  |

(e) Structure 5, B<sub>7</sub>Mg<sub>4</sub><sup>+</sup> (C<sub>1</sub>, <sup>1</sup>A)

|    |             |             |             |
|----|-------------|-------------|-------------|
| B  | -0.33216500 | 0.87665700  | -1.24808800 |
| B  | -1.11766300 | 1.59121900  | -0.06736100 |
| B  | -1.22035200 | 1.06244700  | 1.37799400  |
| B  | 0.52150300  | -1.16002900 | 1.47871200  |
| B  | 0.07034700  | 0.24166800  | 0.46958200  |
| B  | -0.57892200 | -0.21409500 | 2.02298000  |
| B  | 1.02877200  | 0.07678000  | -1.12942700 |
| Mg | -0.28095700 | -1.89170000 | -0.86610500 |
| Mg | 2.32241400  | -1.07980900 | 0.23800900  |
| Mg | -2.52916400 | -0.34537700 | -0.27503000 |
| Mg | 1.16624100  | 2.28578400  | -0.30703800 |

**Figure S1.** Alternative optimized low-lying structures of  $B_7Mg_4^+$  cluster. Relative energies at the PBE0/6-311+G\* level are shown without brackets, including corrections for the zero-point energies (ZPEs). Also shown are relative energies for top low-lying isomers at the single-point CCSD(T)/6-311+G\* (in brackets) and B3LYP/6-311+G\* (in square brackets) levels. All energies are in eV.

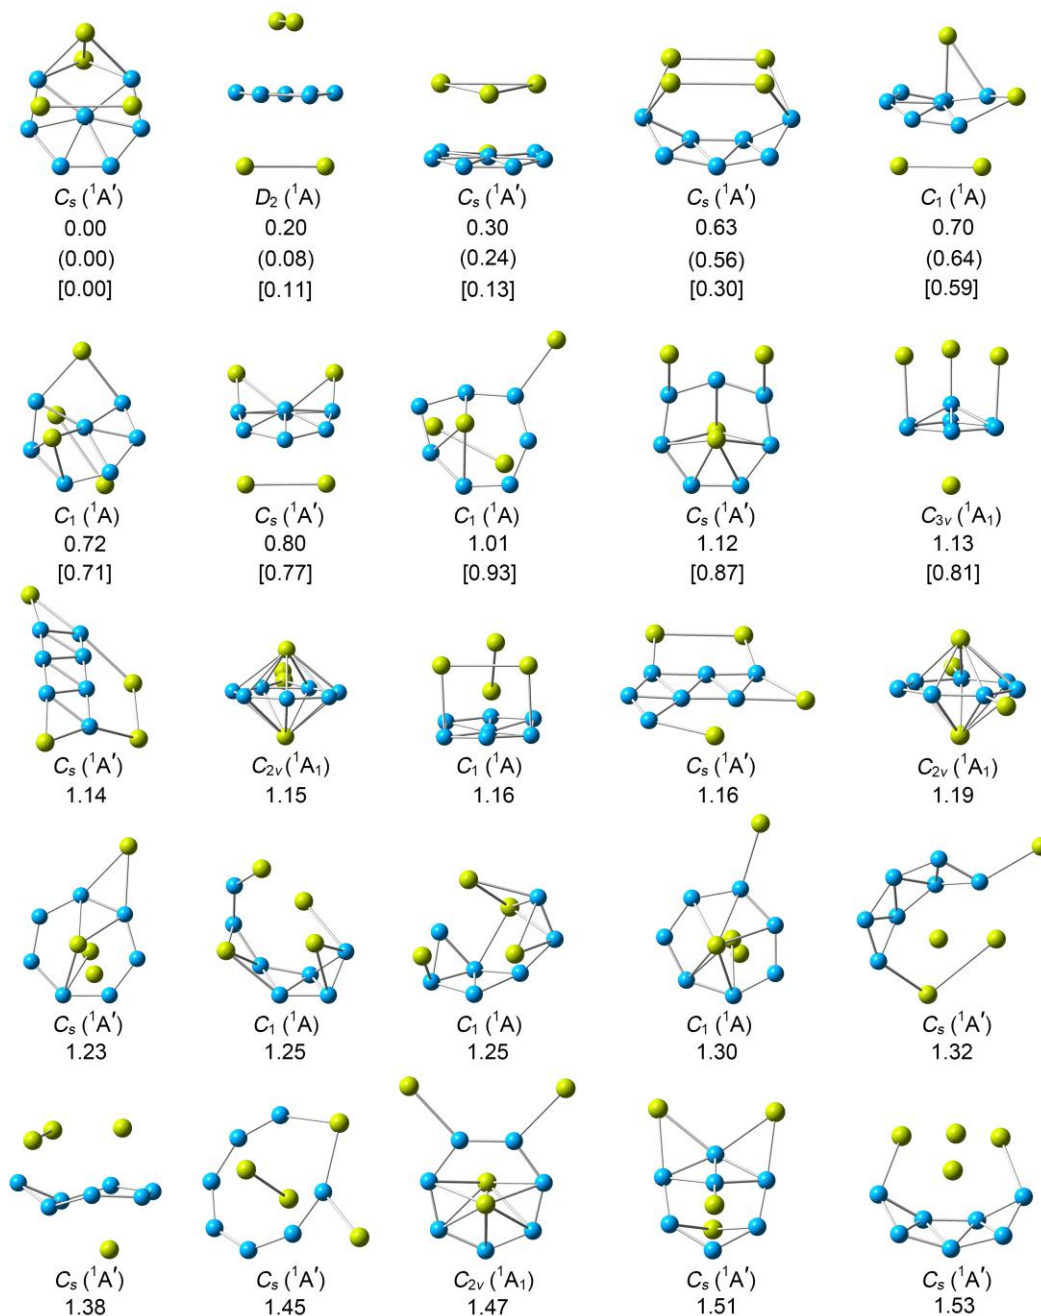

**Figure S2.** Calculated NICS<sub>zz</sub> data for B<sub>7</sub>Mg<sub>4</sub><sup>+</sup> cluster at the PBE0/6-311+G\* level. These values are calculated at the center of a B<sub>3</sub> triangle, as well as of a rhombic unit between a B<sub>3</sub> triangle and the midpoint of two vertical Mg atoms, which are associated to σ aromaticity. Other values are calculated at a distance of 1.0, 1.5, and 2.0 Å above or below the plane, which probe π aromaticity.

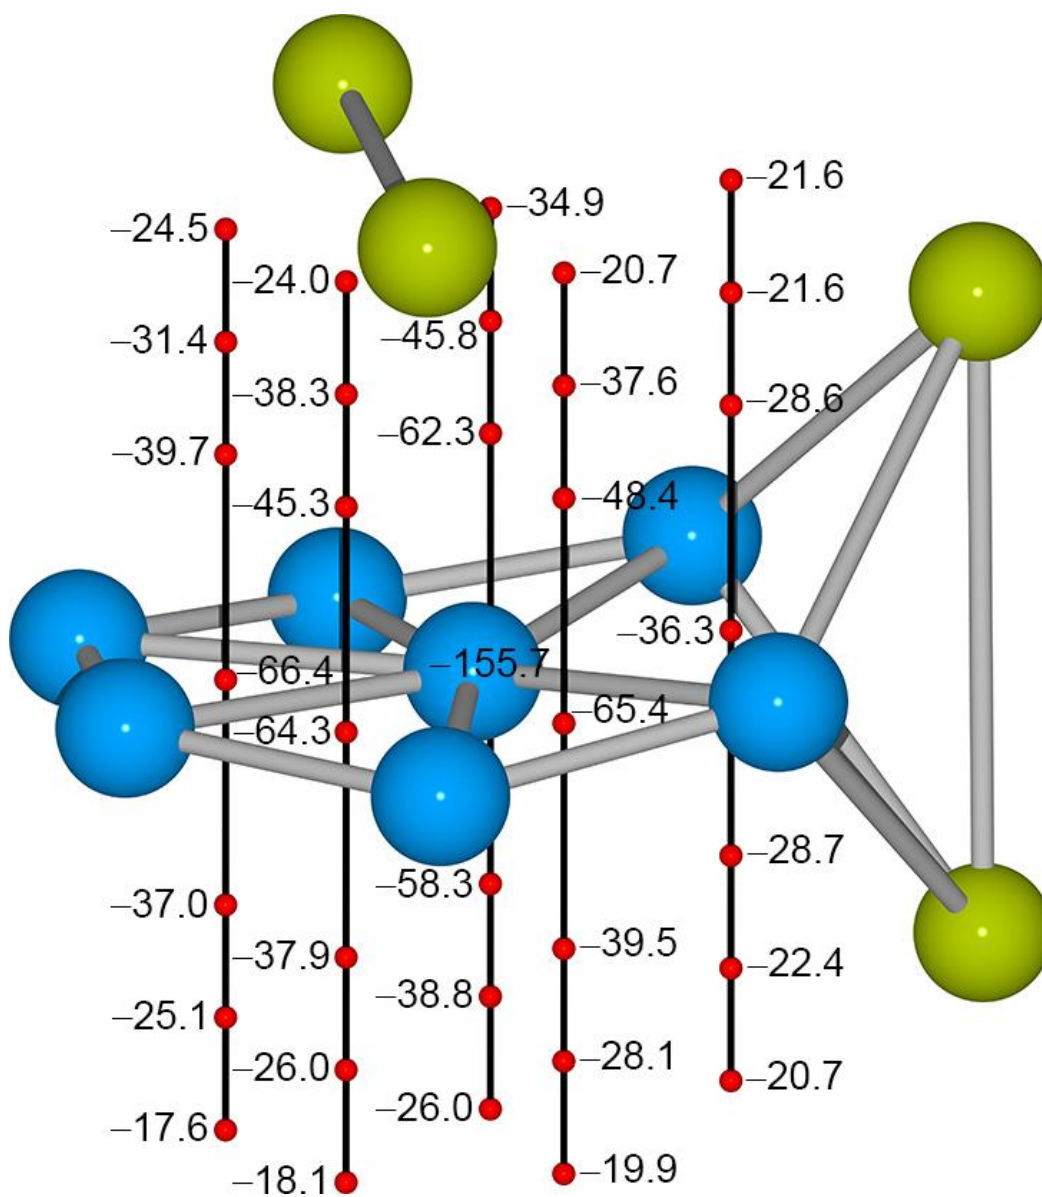

**Figure S3.** The iso-chemical shielding surfaces (ICSSs) of  $B_7Mg^+$  cluster, calculated at the boron plane, as well as at a distance of 0.5, 1.0, and 1.5 Å above the plane, respectively. A positive ICSS value indicates  $\pi$  or  $\sigma$  aromaticity; and vice versa.

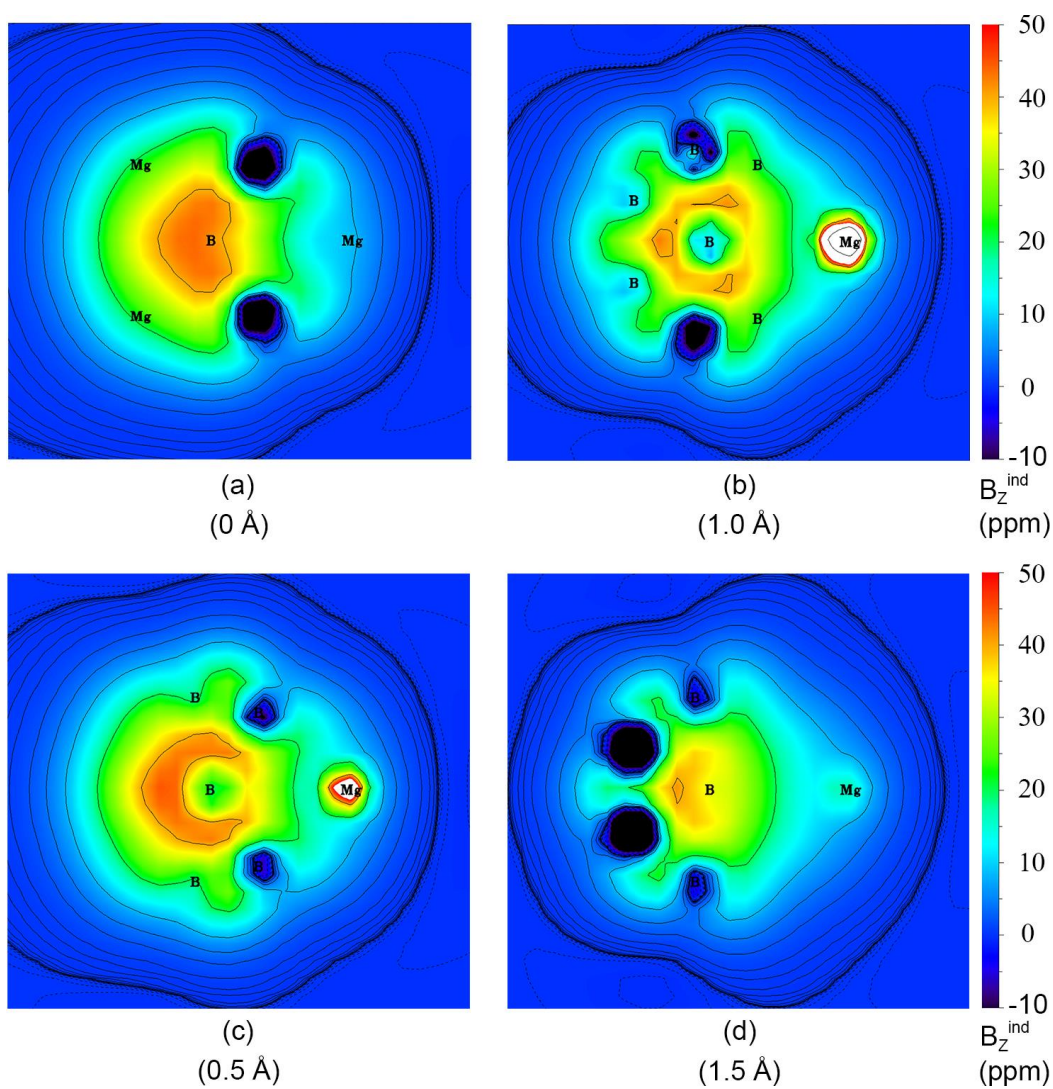

Supplement: d2nj05352g1.pdf [file d2nj05352g1.pdf]
